# Supplementary material for: Aberrant fragmentomic features of circulating cell-free mitochondrial DNA as novel biomarkers in cancer patients
Source: Research Square preprint supplement (doi:10.21203/rs.3.rs-3620407/v1), 2023-12-07
Supplement: Supplementary file 1 [file feedf83745eb51d962b8b23b.pdf]

**Supplementary Table 1 | Demographic and clinicopathological characteristics of individuals in training cohort.**

| Disease type                 | Age (years)          | Gender (n, %) |             | Stage (n, %) |            |
|------------------------------|----------------------|---------------|-------------|--------------|------------|
|                              | (Median [MIN, MAX] ) | Male          | Female      | Early stage  | Late stage |
| <b>Malignant tumor</b>       | 56.5 [36, 84]        | 93 (46.5%)    | 107 (53.5%) | 101 (50.5%)  | 99 (49.5%) |
| Non-small cell lung cancer   | 63.0 [37, 77]        | 28 (56.0%)    | 22 (44.0%)  | 22 (44.0%)   | 28 (56.0%) |
| Hepatocellular carcinoma     | 56.5 [36, 71]        | 39 (78.0%)    | 11 (22.0%)  | 34 (68.0%)   | 16 (32.0%) |
| Ovarian cancer               | 56.5 [36, 74]        | 0             | 40 (100%)   | 15 (37.5%)   | 25 (62.5%) |
| Colorectal cancer            | 62.5 [36, 84]        | 18 (60.0%)    | 12 (40.0%)  | 10 (33.3%)   | 20 (66.7%) |
| Breast cancer                | 50.5 [36, 73]        | 0             | 20 (100%)   | 12 (60.0%)   | 8 (40.0%)  |
| Renal cell carcinoma         | 56.5 [42, 71]        | 8 (80.0%)     | 2 (20.0%)   | 8 (80.0%)    | 2 (20.0%)  |
| <b>Benign tumor</b>          | 47.0 [33, 78]        | 11 (27.5%)    | 29 (72.5%)  | NA           | NA         |
| Benign lung tumor            | 59.0 [42, 69]        | 5 (71.4%)     | 2 (28.6%)   |              |            |
| Benign colonic neoplasm      | 52.5 [45, 63]        | 6 (75.0%)     | 2 (25.0%)   |              |            |
| Benign ovarian tumor         | 54.0 [33, 78]        | 0             | 25 (100%)   |              |            |
| <b>Inflammatory diseases</b> | 49.0 [25, 92]        | 55 (71.4%)    | 22 (28.5%)  | NA           | NA         |
| Pneumonia                    | 59.5 [34, 92]        | 12 (60.0%)    | 8 (40.0%)   |              |            |
| Inflammatory bowel disease   | 50.0 [30, 79]        | 5 (71.4%)     | 2 (28.6%)   |              |            |
| Hepatitis B                  | 48.5 [25, 76]        | 38 (76.0%)    | 12 (24.0%)  |              |            |
| <b>Healthy control</b>       | 54.0 [25, 78]        | 51 (66.2%)    | 26 (33.8%)  | NA           | NA         |

Abbreviations: NA, not applicable.

Supplementary Table 2 | Demographic and clinicopathological characteristics of individuals in validation cohort.

|                            | Age (years)          | Gender (n, %) |             | Stage (n, %) |            |
|----------------------------|----------------------|---------------|-------------|--------------|------------|
|                            | (Median [MIN, MAX] ) | Male          | Female      | Early stage  | Late stage |
| Malignant tumor            | 56.5 [38, 84]        | 98 (49.0%)    | 102 (51.0%) | 115 (57.5%)  | 85 (42.5%) |
| Non-small cell lung cancer | 63.0 [40, 68]        | 30 (60.0%)    | 20 (40.0%)  | 28 (56.0%)   | 22 (44.0%) |
| Hepatocellular carcinoma   | 56.5 [38, 74]        | 41 (82.0%)    | 9 (18.0%)   | 32 (64.0%)   | 18 (36.0%) |
| Ovarian cancer             | 56.5 [31, 80]        | 0             | 40 (100%)   | 17 (42.5%)   | 23 (57.5%) |
| Colorectal cancer          | 63.5 [45, 77]        | 19 (63.3%)    | 11 (36.7%)  | 15 (50.0%)   | 15 (50.0%) |
| Breast cancer              | 52.5 [38, 84]        | 0             | 20 (100%)   | 18 (90.0%)   | 2 (10.0%)  |
| Renal cell carcinoma       | 58.5 [46, 71]        | 8 (80.0%)     | 2 (20.0%)   | 5 (50.0%)    | 5 (50.0%)  |
| Benign tumor               | 46.5 [30, 74]        | 11 (27.5%)    | 29 (72.5%)  | NA           | NA         |
| Benign lung tumor          | 56.5 [38, 71]        | 4 (57.1%)     | 3 (42.9%)   |              |            |
| Benign colonic neoplasm    | 56.5 [41, 74]        | 7 (87.5%)     | 1 (12.5%)   |              |            |
| Benign ovarian tumor       | 56.5 [30, 70]        | 0             | 25 (100%)   |              |            |
| Inflammation               | 50.0 [22, 84]        | 54 (70.1%)    | 23 (29.9%)  | NA           | NA         |
| Pneumonia                  | 61.5 [22, 76]        | 14 (70.0%)    | 6 (30.0%)   |              |            |
| Inflammatory bowel disease | 50.0 [38, 84]        | 5 (71.4%)     | 2 (28.6%)   |              |            |
| Hepatitis B                | 49.0 [29, 72]        | 35 (70.0%)    | 15 (30.0%)  |              |            |
| Healthy control            | 54.5 [26, 80]        | 47 (61.0%)    | 30 (39.0%)  | NA           | NA         |

Abbreviations: NA, not applicable.

Supplementary Table 3 | Demographic and clinicopathological characteristics of 12 HCC patients undergoing treatment with TACE.

| Case   | Age (years) | Gender | BCLC stage | No. of<br>treatment sessions | Response |
|--------|-------------|--------|------------|------------------------------|----------|
| HCC 1  | 57          | Male   | B          | 2                            | CR       |
| HCC 2  | 64          | Male   | B          | 3                            | PR       |
| HCC 3  | 66          | Female | A          | 2                            | PR       |
| HCC 4  | 53          | Male   | A          | 2                            | SD       |
| HCC 5  | 68          | Male   | A          | 1                            | SD       |
| HCC 6  | 68          | Female | A          | 2                            | SD       |
| HCC 7  | 44          | Male   | B          | 1                            | SD       |
| HCC 8  | 50          | Male   | A          | 2                            | SD       |
| HCC 9  | 46          | Male   | C          | 2                            | SD       |
| HCC 10 | 57          | Male   | B          | 1                            | PD       |
| HCC 11 | 54          | Female | B          | 1                            | PD       |
| HCC 12 | 59          | Male   | B          | 1                            | PD       |

Abbreviations: TACE, transcatheter arterial chemoembolization; CR, complete response; PR, partial response; SD, stable disease; PD, progressive disease.

**Supplementary Table 4 | Summary of capture-based mtDNA sequencing data.**

| Subjects      | No. of patients | Specimen types     | No. of samples | Average number of total reads | Average mtDNA depth | Average Q30 | Average mtDNA mapping rate |
|---------------|-----------------|--------------------|----------------|-------------------------------|---------------------|-------------|----------------------------|
| HCC           | 100*            | Plasma             | 100            | 14,494,509                    | 3,549               | 94.07%      | 27.05%                     |
|               |                 | Fresh tumor tissue | 40             | 9,701,715                     | 5,938               | 93.23%      | 63.70%                     |
|               |                 | Adjacent non-tumor | 40             | 8,962,550                     | 5,324               | 93.08%      | 61.03%                     |
|               |                 | PBMC               | 40             | 9,264,812                     | 4,234               | 92.16%      | 52.55%                     |
| HCC with TACE | 12**            | Plasma             | 24             | 14,253,905                    | 5,306               | 94.01%      | 29.71%                     |
| NSCLC         | 100             | Plasma             | 100            | 11,259,595                    | 3,729               | 93.19%      | 33.73%                     |
| CRC           | 60              | Plasma             | 60             | 11,241,468                    | 3,660               | 94.37%      | 34.36%                     |
| OV            | 80              | Plasma             | 80             | 13,274,750                    | 4,213               | 93.32%      | 27.13%                     |
| BC            | 40              | Plasma             | 40             | 11,701,715                    | 3,745               | 92.93%      | 30.04%                     |
| RCC           | 20              | Plasma             | 20             | 12,246,006                    | 4,063               | 92.82%      | 31.06%                     |
| BLT           | 14              | Plasma             | 14             | 13,500,546                    | 4,639               | 92.48%      | 32.90%                     |
| BCN           | 16              | Plasma             | 16             | 14,471,723                    | 5,379               | 92.85%      | 31.56%                     |
| BOT           | 50              | Plasma             | 50             | 13,274,750                    | 4,218               | 93.45%      | 32.67%                     |
| HB            | 100             | Plasma             | 100            | 13,962,550                    | 4,489               | 92.11%      | 29.35%                     |
| PN            | 40              | Plasma             | 40             | 11,264,812                    | 3,900               | 93.78%      | 31.01%                     |
| IBD           | 14              | Plasma             | 14             | 11,241,468                    | 3,800               | 92.56%      | 29.82%                     |
| HC            | 154             | Plasma             | 154            | 12,488,021                    | 4,121               | 93.84%      | 29.34%                     |

Abbreviations: HCC, hepatocellular carcinoma; TACE, transcatheter arterial chemoembolization; NSCLC, non-small cell lung cancer; CRC, colorectal cancer; OV, ovarian cancer; BC, breast cancer; RCC, renal cell carcinoma; BLT, benign lung tumors; BCN, benign colonic neoplasm; BOT, benign ovarian tumor; HB, hepatitis B; PN, pneumonia; IBD, inflammatory bowel disease. HC, healthy control. \*Fresh tumor tissue, adjacent non-tumor and PBMC were collected from 40 of 100 patients with HCC. \*\*Blood was collected 1 day before and 6 to 9 weeks after first TACE treatment in 12 patients with HCC.

Supplementary Table 5 | Summary of whole genome sequencing data.

| Subjects      | No. of patients | Specimen types | No. of samples | Average<br>number of total reads | Average<br>nDNA (mtDNA) depth | Average<br>mtDNA coverage | Average Q30 |
|---------------|-----------------|----------------|----------------|----------------------------------|-------------------------------|---------------------------|-------------|
| HCC           | 30              | Plasma         | 30             | 152,987,154                      | 15 (78.91)                    | 100%                      | 93.25%      |
| HCC with TACE | 12*             | Plasma         | 24             | 141,166,884                      | 15 (65.25)                    | 100%                      | 92.42%      |
| BOT           | 30              | Plasma         | 30             | 124,186,415                      | 15 (59.84)                    | 100%                      | 92.74%      |
| HB            | 30              | Plasma         | 30             | 132,178,567                      | 15 (61.19)                    | 100%                      | 92.98%      |
| HC            | 30              | Plasma         | 30             | 101,357,859                      | 15 (71.91)                    | 100%                      | 92.41%      |

Abbreviations: HCC, hepatocellular carcinoma; TACE, transcatheter arterial chemoembolization; BOT, benign ovarian tumor; HB, hepatitis B; HC, healthy control. \*Blood was collected 1 day before and 6 to 9 weeks after the first TACE treatment in 12 patients with HCC.

Supplementary Table 6 | Summary of tumor-derived somatic mutations and germline variants in 40 patients with hepatocellular carcinoma.

|                                                           | Tumor-derived somatic mutations (n = 138) | Germline variants (n = 1192) |
|-----------------------------------------------------------|-------------------------------------------|------------------------------|
| Substitution types (n, %)                                 |                                           |                              |
| T <sub>H</sub> > C <sub>H</sub>                           | 24 (17.39%)                               | 390 (32.72%)                 |
| T <sub>L</sub> > C <sub>L</sub>                           | 30 (21.74%)                               | 284 (23.82%)                 |
| C <sub>H</sub> > T <sub>H</sub>                           | 46 (33.33%)                               | 192 (16.11%)                 |
| C <sub>L</sub> > T <sub>L</sub>                           | 21 (15.22%)                               | 262 (21.98%)                 |
| Other                                                     | 17 (12.32%)                               | 64 (5.37%)                   |
| Heteroplasmy level in plasma<br>(Median [MIN, MAX])       | 0.02465 (0.0104-0.3035)                   | 0.98250 (0.9607-1.0000)      |
| Heteroplasmy level in tumor tissue<br>(Median [MIN, MAX]) | 0.02430 (0.0108-0.3029)                   | 0.99030 (0.9896-1.0000)      |

Supplementary Table 7 | MEFI performance for cancer detection in validation cohort.

| Cohort            | No. of Cancer | No. of Control | AUC (95% CI)           | Sensitivity (95% CI)   | Specificity (95% CI)   |
|-------------------|---------------|----------------|------------------------|------------------------|------------------------|
| MT <i>vs.</i> HC  | 200           | 77             | 0.9735 (0.9562-0.9908) | 91.00% (86.22%-94.23%) | 91.94% (82.47%-96.51%) |
| MT <i>vs.</i> BT  | 200           | 40             | 0.9423 (0.9092-0.9754) | 78.33% (70.15%-84.76%) | 97.50% (87.15%-99.87%) |
| MT <i>vs.</i> INF | 200           | 77             | 0.9498 (0.9200-0.9796) | 88.46% (81.83%-92.88%) | 93.51% (85.68%-97.19%) |

Abbreviations: MT, malignant tumor; HC, healthy control; BT, benign tumors; INF, inflammation; AUC, area under the curve.
